# Supplementary material for: Chemotaxonomic Metabolite Profiling of 62 Indigenous Plant Species and Its Correlation with Bioactivities
Source: PubMed Central journal article supplement (PMC6332367; doi:10.3390/molecules201119652), 2015-11-02
Supplement: molecules-20-19652-s001.pdf [file molecules-20-19652-s001.pdf]

## Supplementary Informations

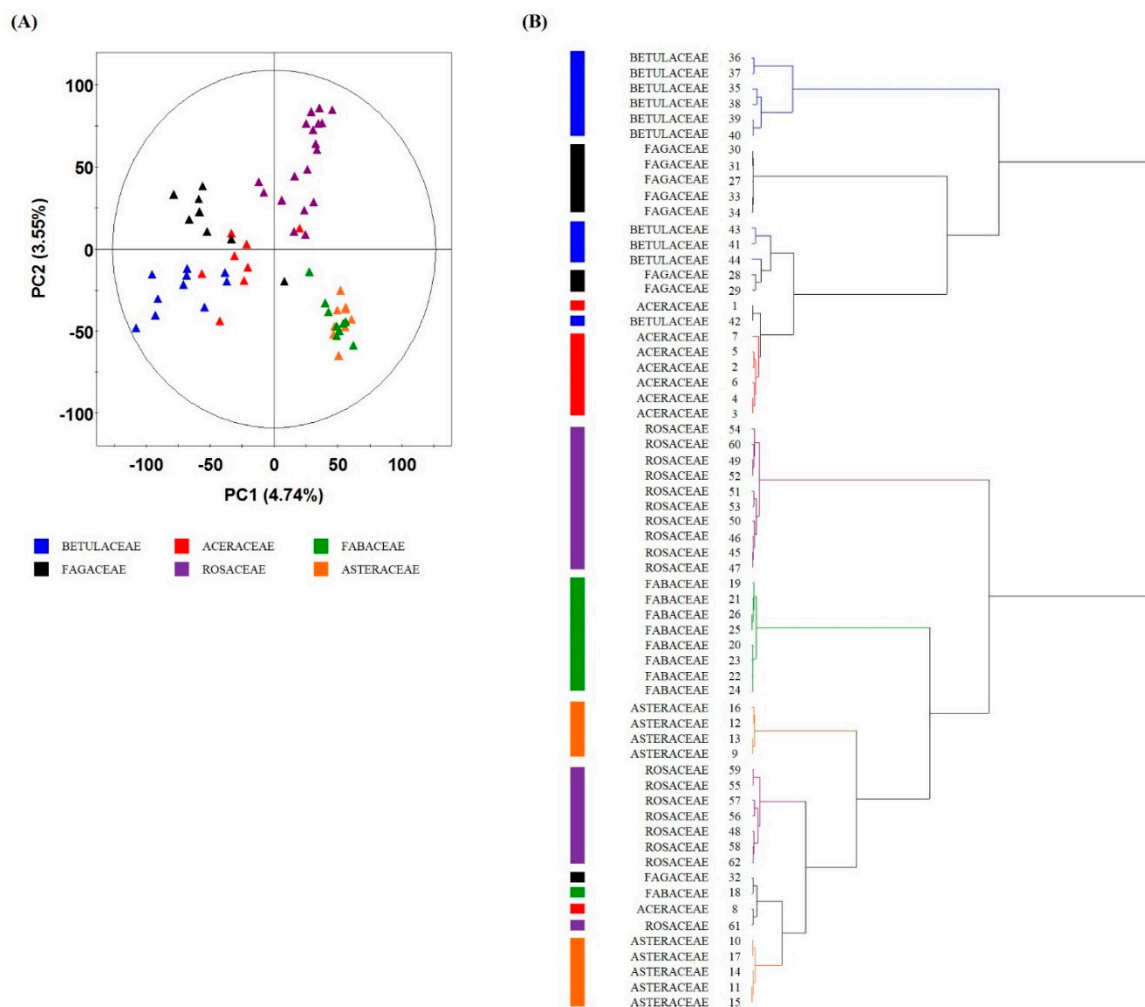

**Figure S1.** Principal component analysis (PCA) score plot (A) and hierarchical cluster analysis (HCA) dendrogram based on PCA results (B) derived from the ultrahigh performance liquid chromatography (UHPLC)-linear trap quadrupole-ion trap (LTQ-IT) mass spectrometry/mass spectrometry (MS/MS) data of 62 indigenous Korean plant species. Samples are colored according to family.

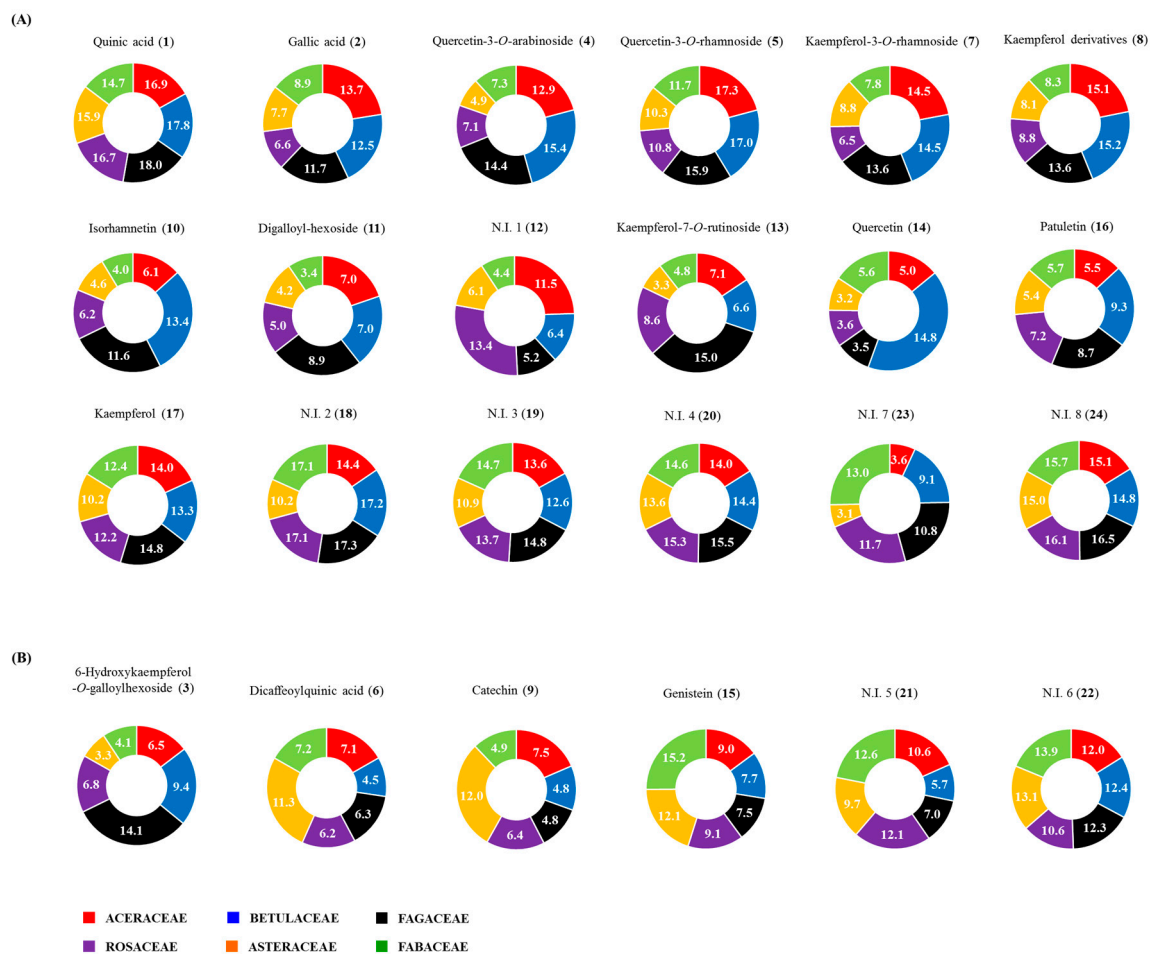

**Figure S2.** Doughnut charts of an average percentage of individual compounds in plant families. Levels of compounds are peak area transformed by  $\log_{10}$  analyzed by ultrahigh performance liquid chromatography (UHPLC)-linear trap quadrupole-ion trap (LTQ-IT) mass spectrometry/mass spectrometry (MS/MS).

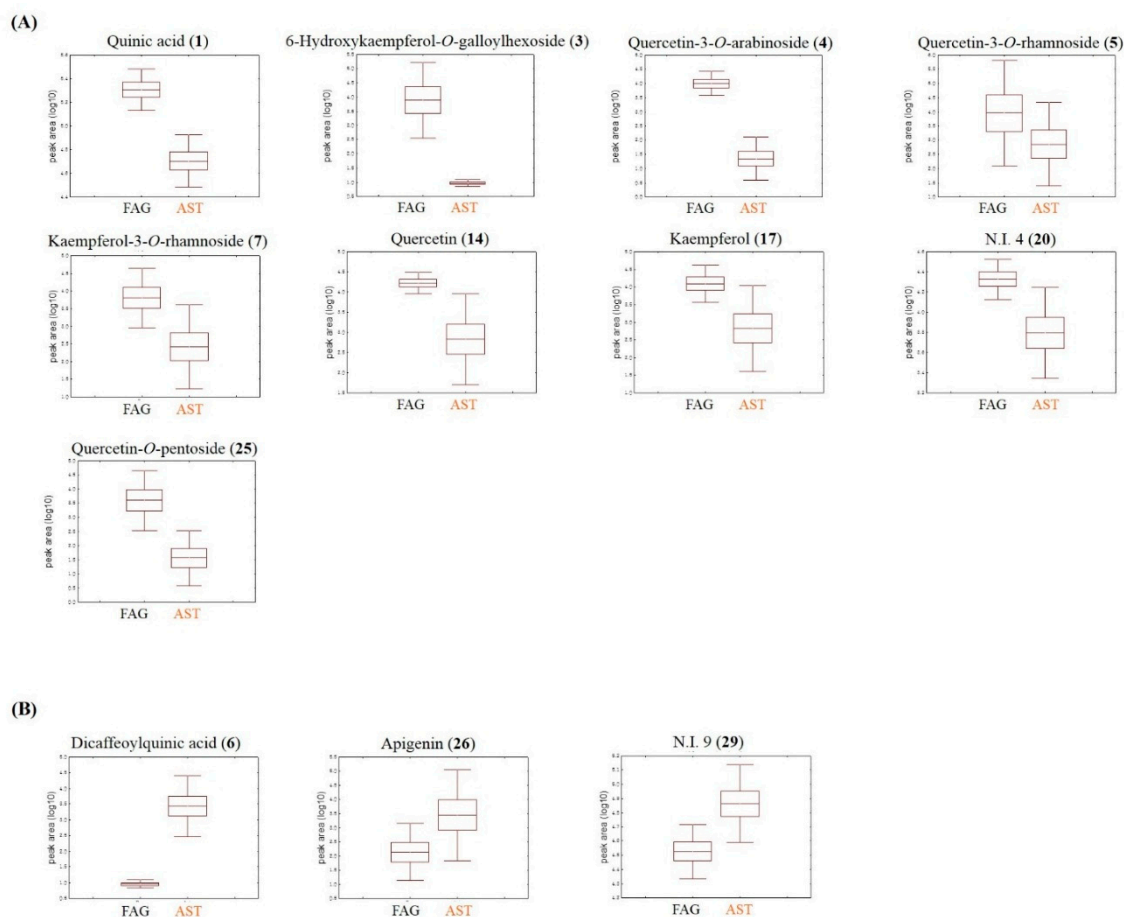

**Figure S3.** Box and whisker plots of significantly different metabolites between Fagaceae and Asteraceae analyzed by ultrahigh performance liquid chromatography (UHPLC)-linear trap quadrupole-ion trap (LTQ-IT) mass spectrometry/mass spectrometry (MS/MS). Metabolites higher in Fagaceae than in Asteraceae (A) and metabolites higher in Asteraceae than in Fagaceae (B) are expressed, respectively. The Y-axis of box and whisker plots indicates the peak area of metabolites transformed by log<sub>10</sub> (FAG, Fagaceae; AST, Asteraceae; *Line*, mean; *box*, standard error; *whisker*, standard deviation).
